# Supplementary material for: Asymmetric organocatalytic SOMO reactions of enol silanes and silyl ketene (thio)acetals
Source: Royal Society of Chemistry journal article supplement (doi:10.1039/c4ob01385a), 2014-01-01
Supplement: c4ob01385a1.pdf [file c4ob01385a1.pdf]

Supporting information for

## Asymmetric organocatalytic SOMO reactions of enol silanes and silyl ketene (thio)acetals

Pavol Tisovský, Mária Mečiarová, and Radovan Šebesta\*

Contents

$^1\text{H}$  and  $^{13}\text{C}$  NMR for synthesized compounds

HPLC chromatograms

Calculation of ECD spectra for **7a**

$^1\text{H}$  NMR spectrum of **3a**

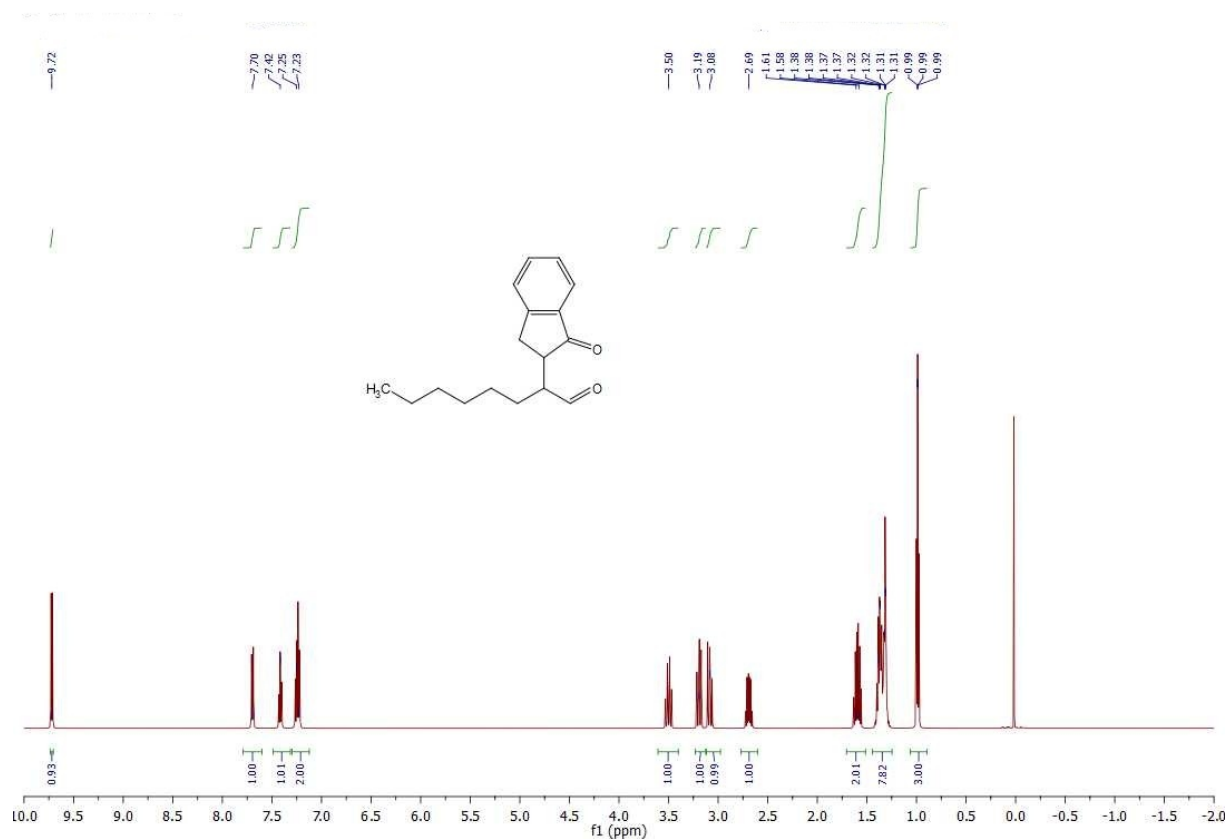

### $^{13}\text{C}$ spectrum of **3a**

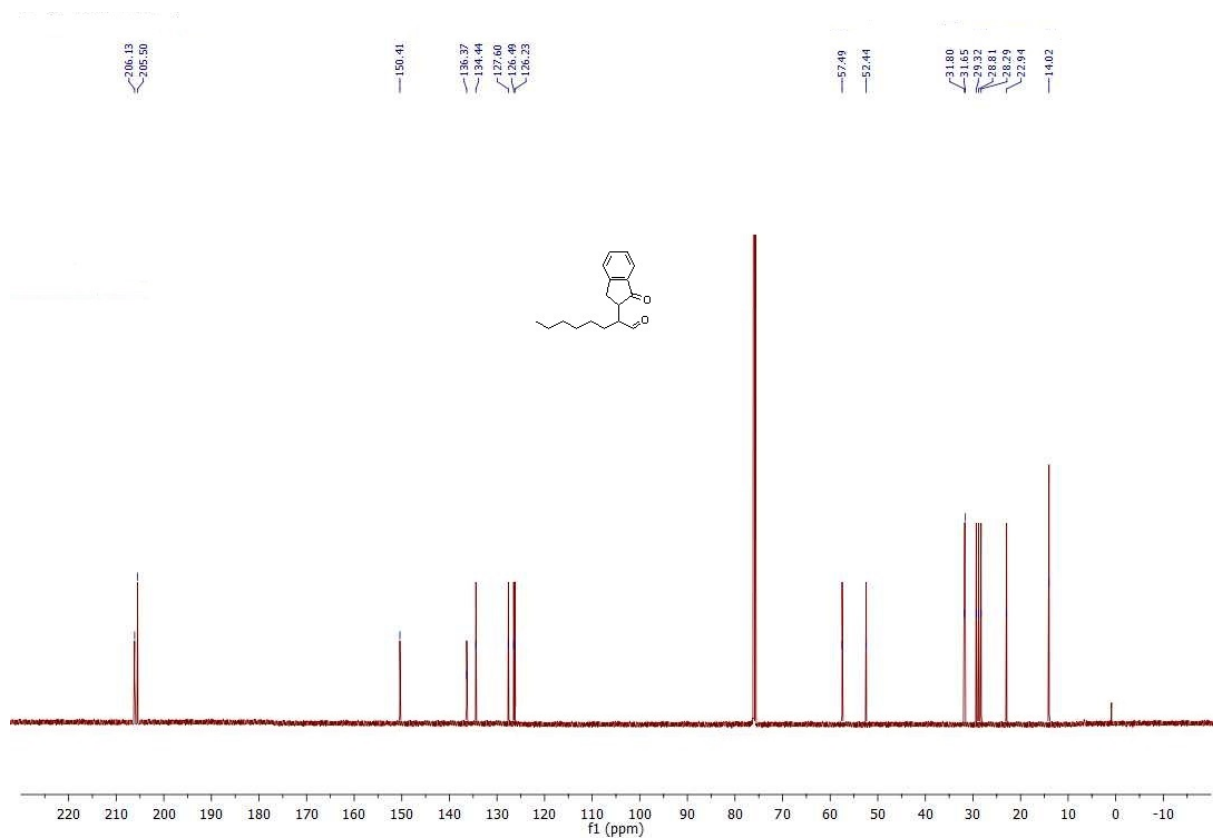

### $^1\text{H}$ NMR spectrum of **3b**

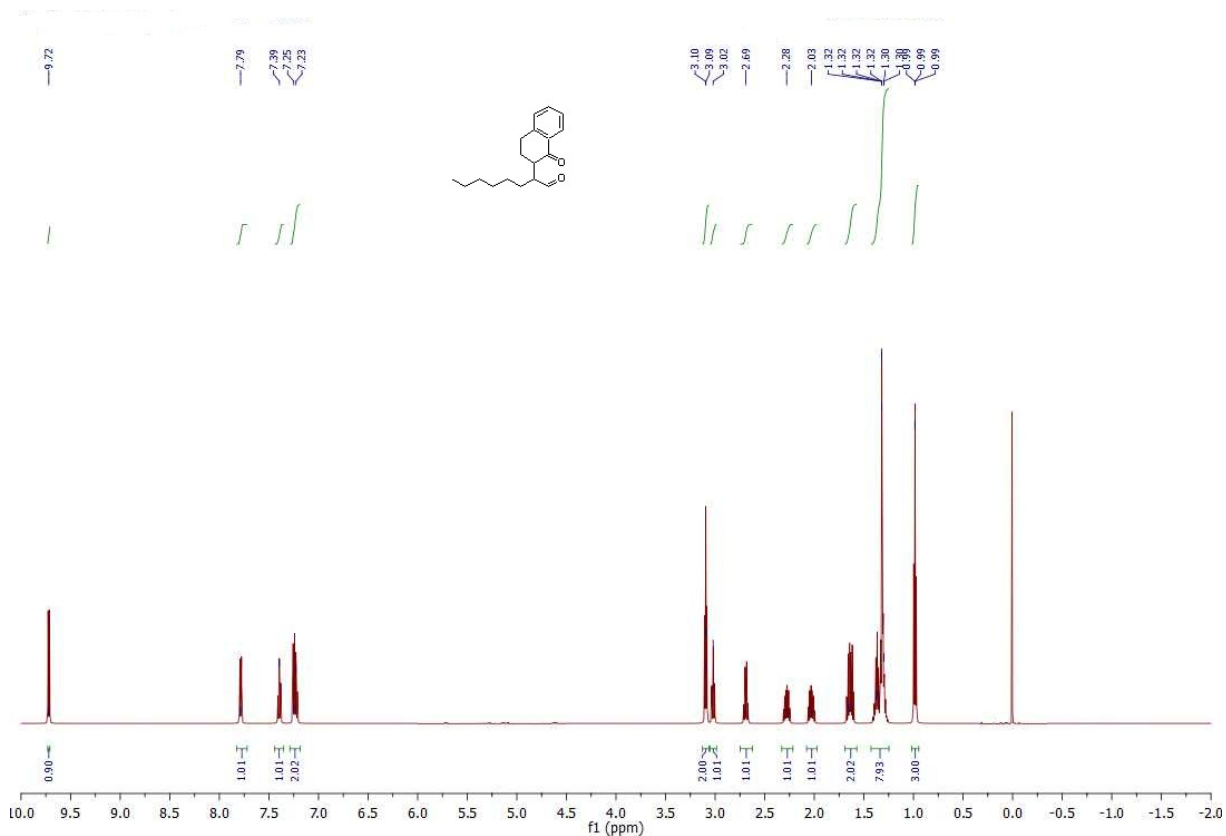

### <sup>13</sup>C spectrum of **3b**

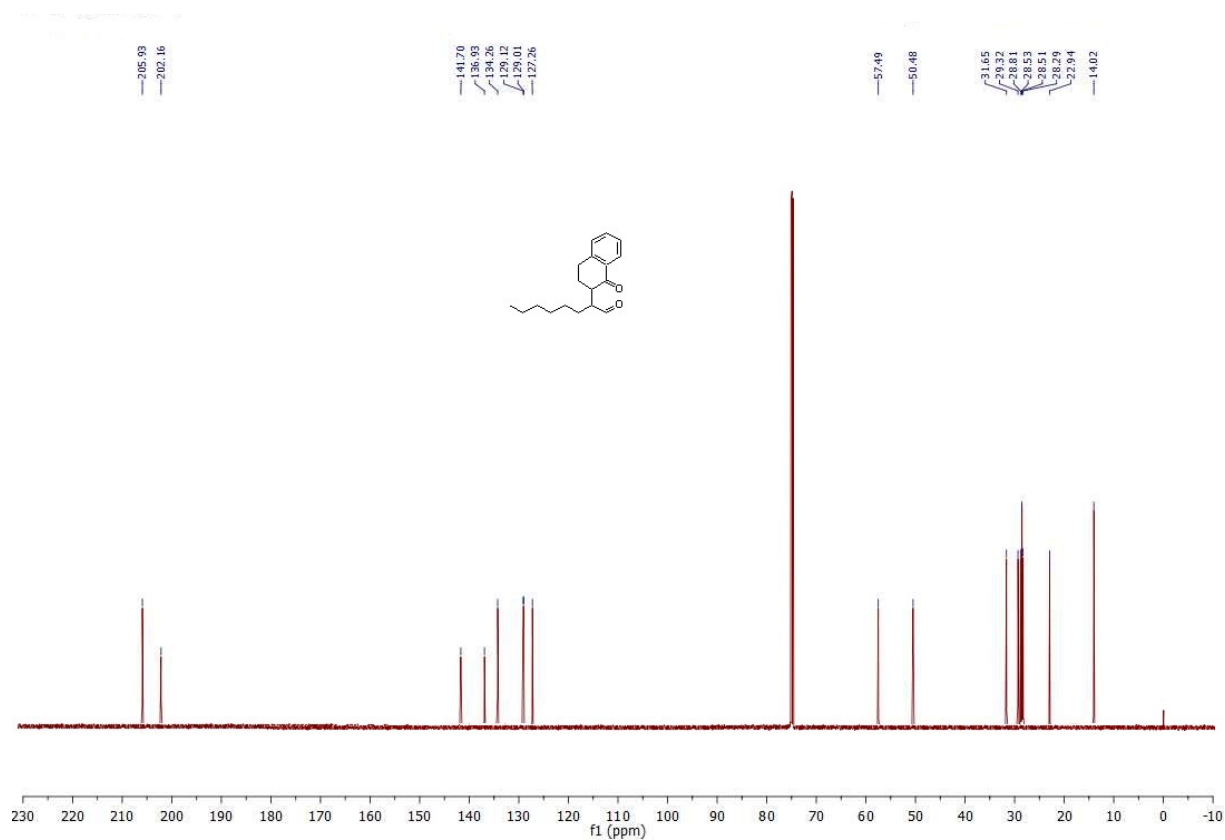

### <sup>1</sup>H NMR spectrum of **3d**

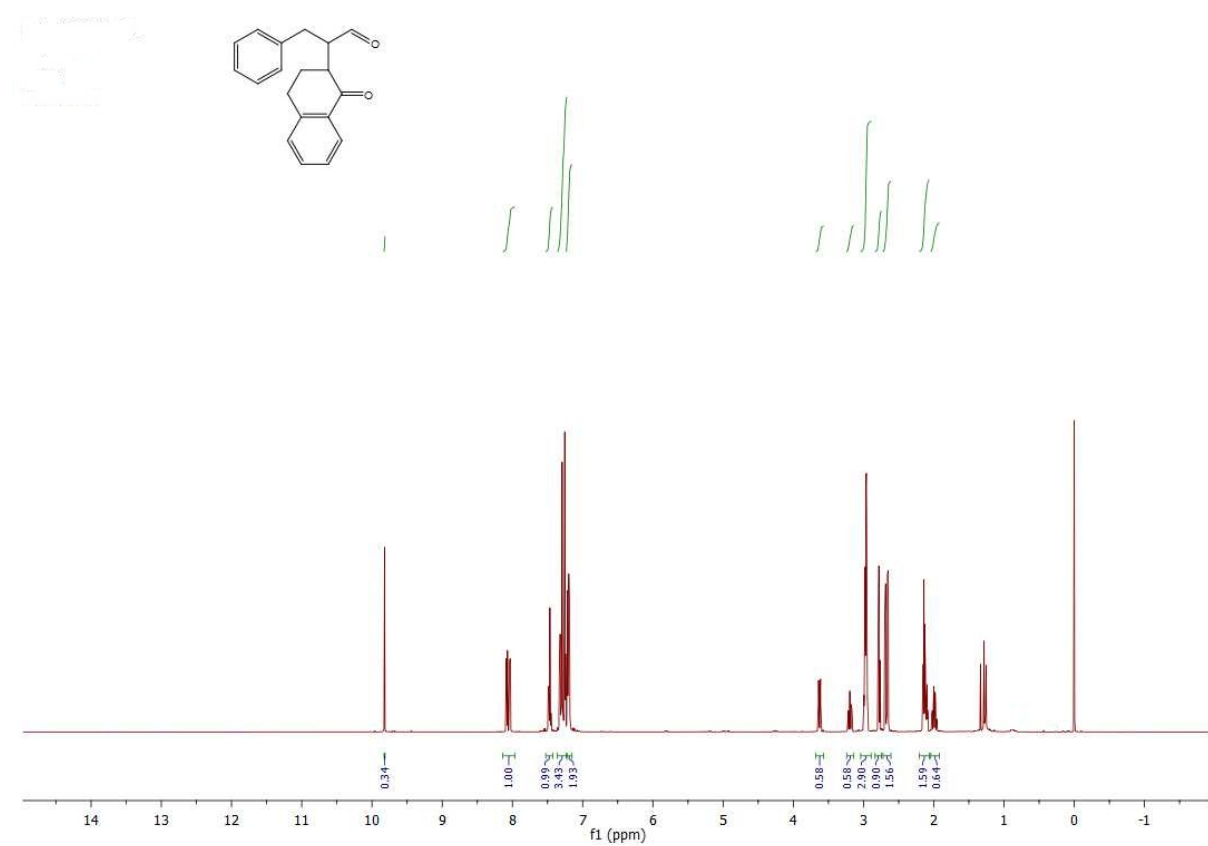

# <sup>13</sup>C spectrum of 3d

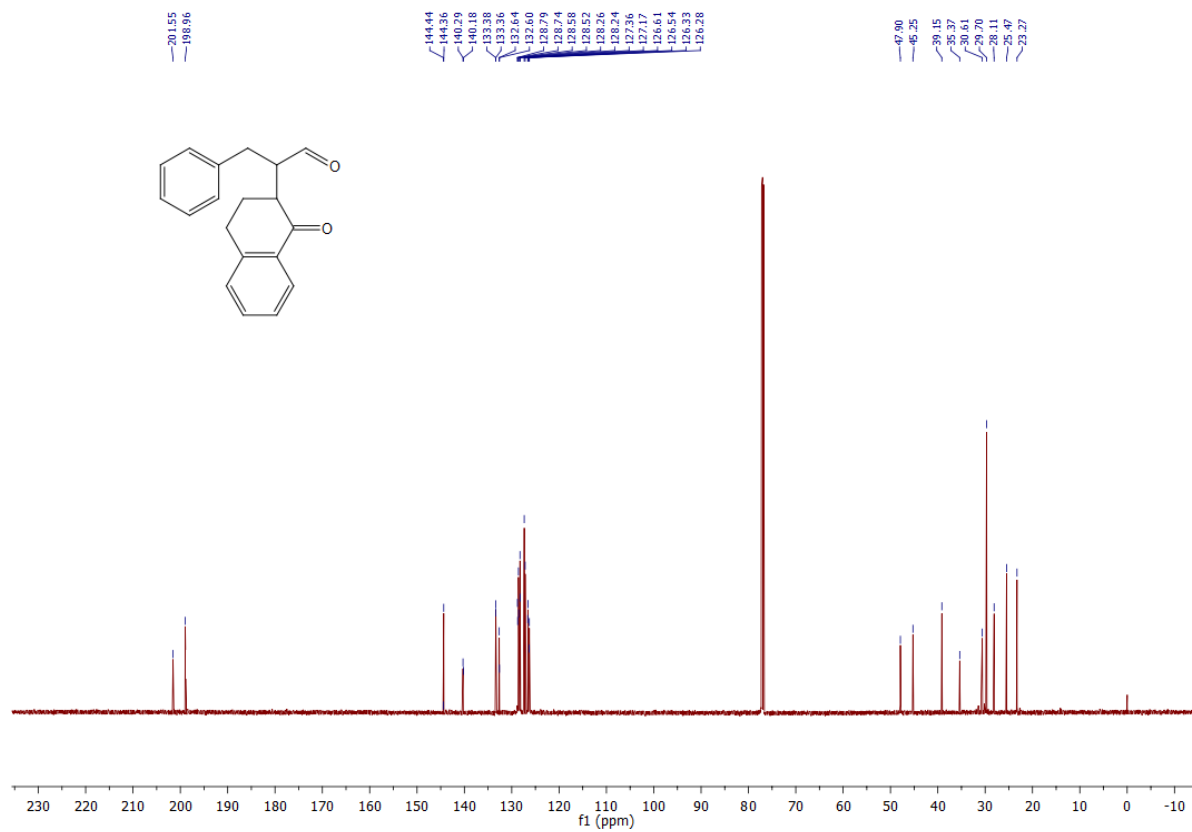

# NOESY of 3d

NOESY, 600 MHz  
PT363  
CDCl3

Sample Name:  
PT363  
Data Collected on:  
Varian-NMR-vnmrs600  
Archive directory:  
/home/branco/vnmrsys/data  
Sample directory:  
PT363\_20130415\_01  
FidFile: data\_NOESY\_01

Pulse Sequence: NOESY  
Solvent: CDCl3

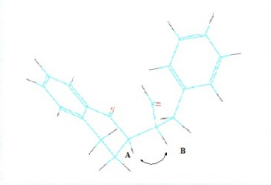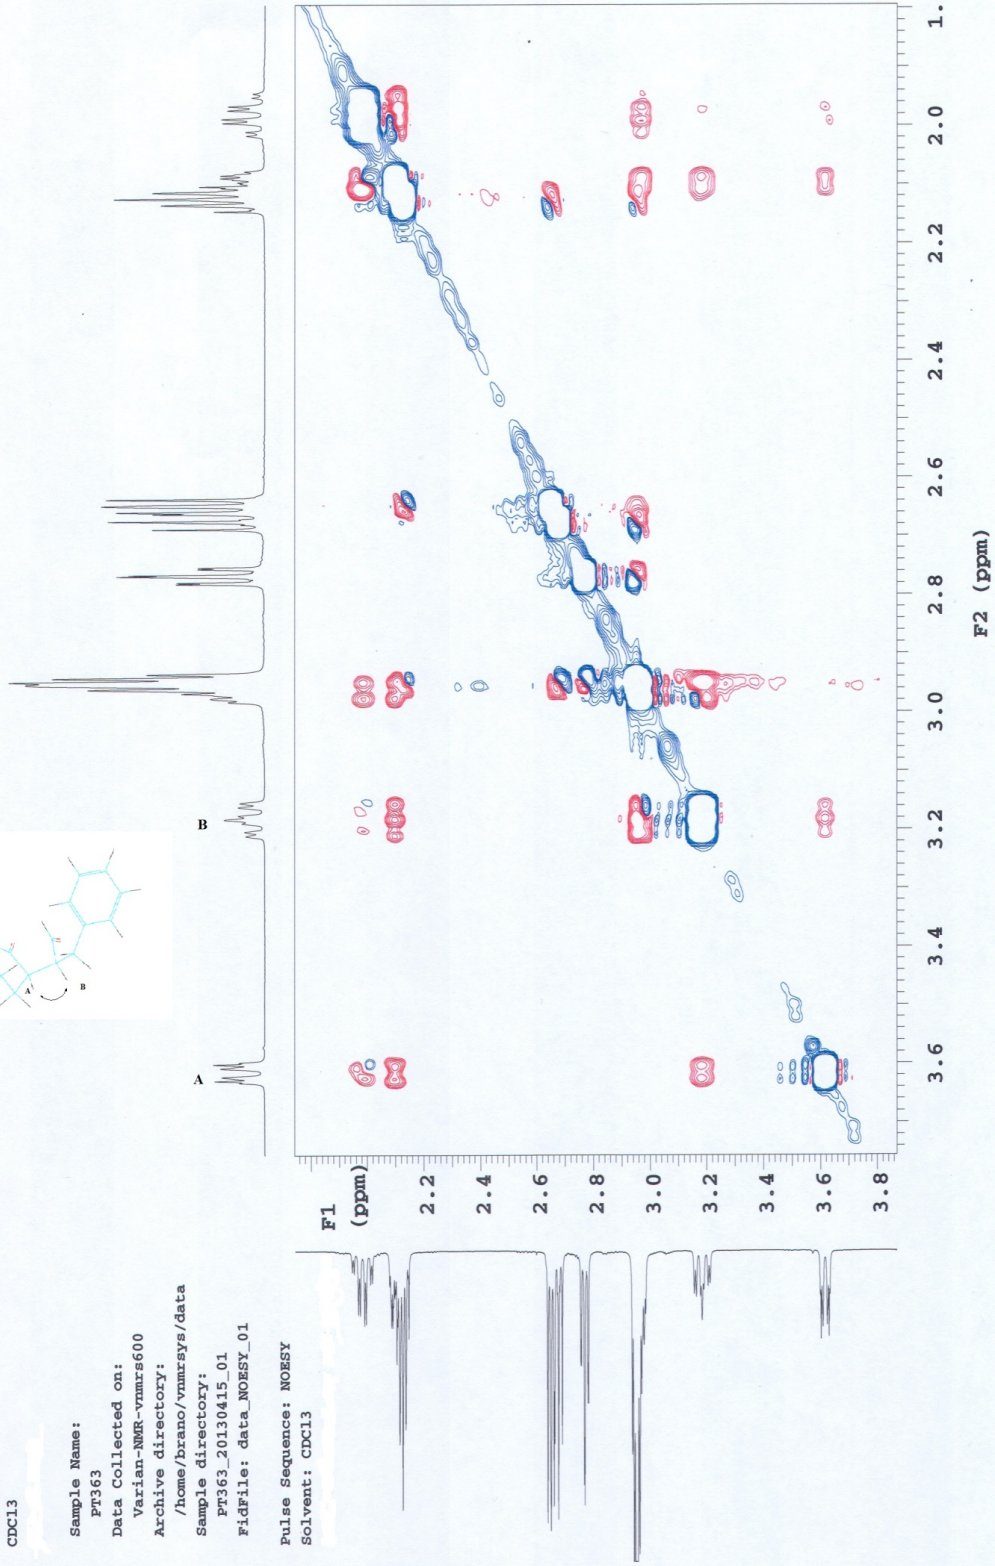

# <sup>1</sup>H NMR spectrum of 7a

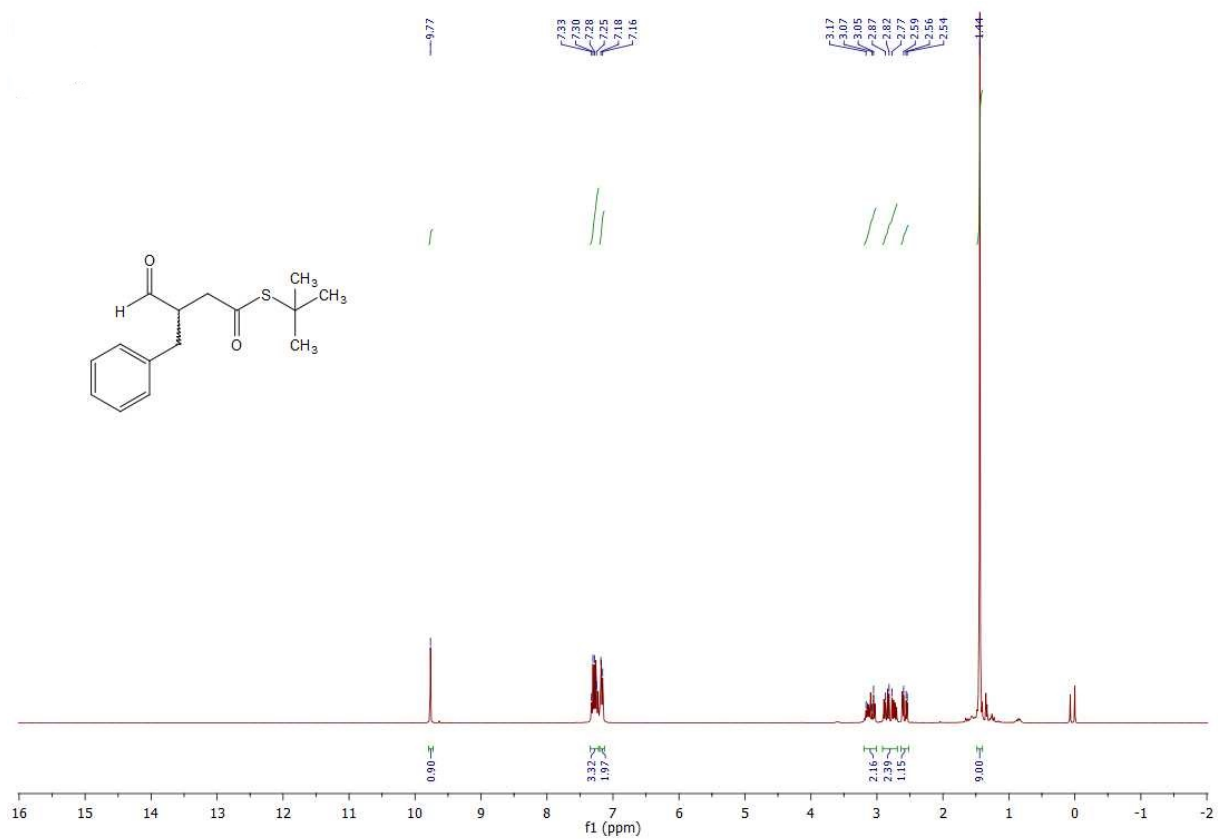

# <sup>13</sup>C spectrum of 7a

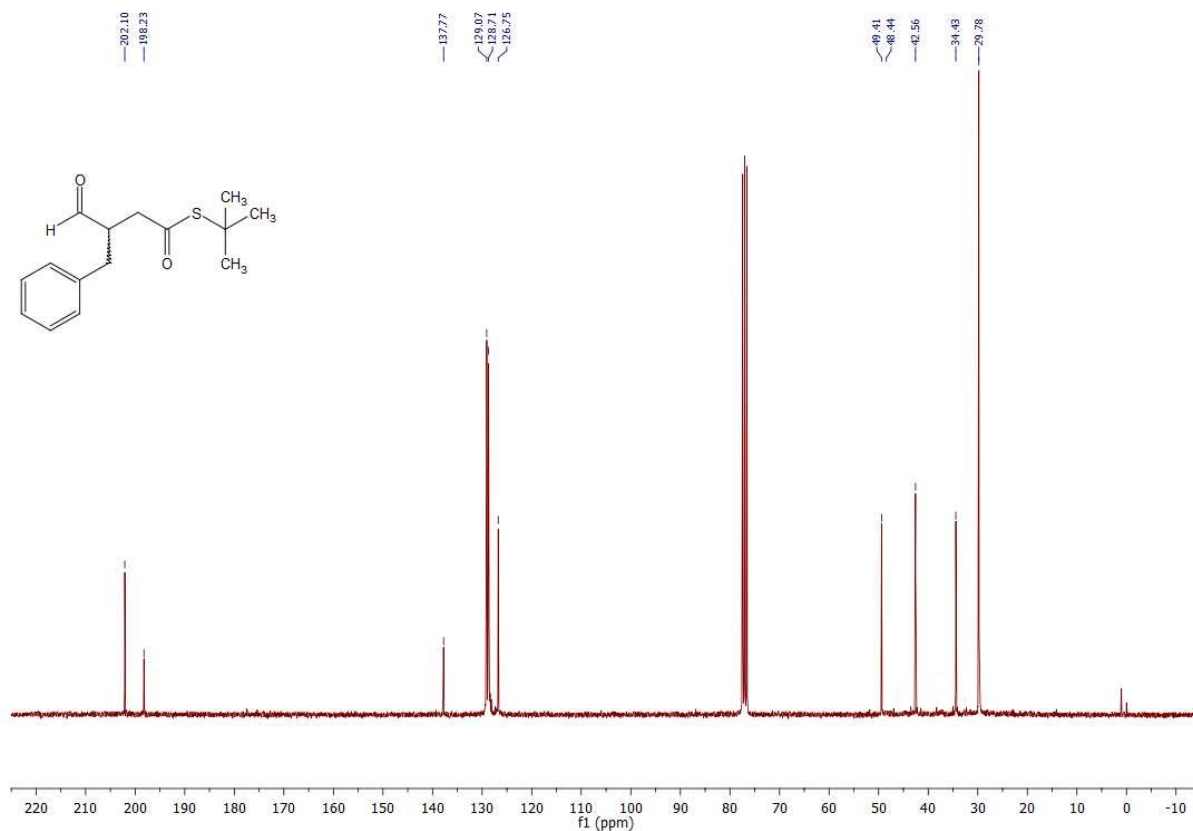

# $^1\text{H}$ NMR spectrum of (*S,S*)-10b

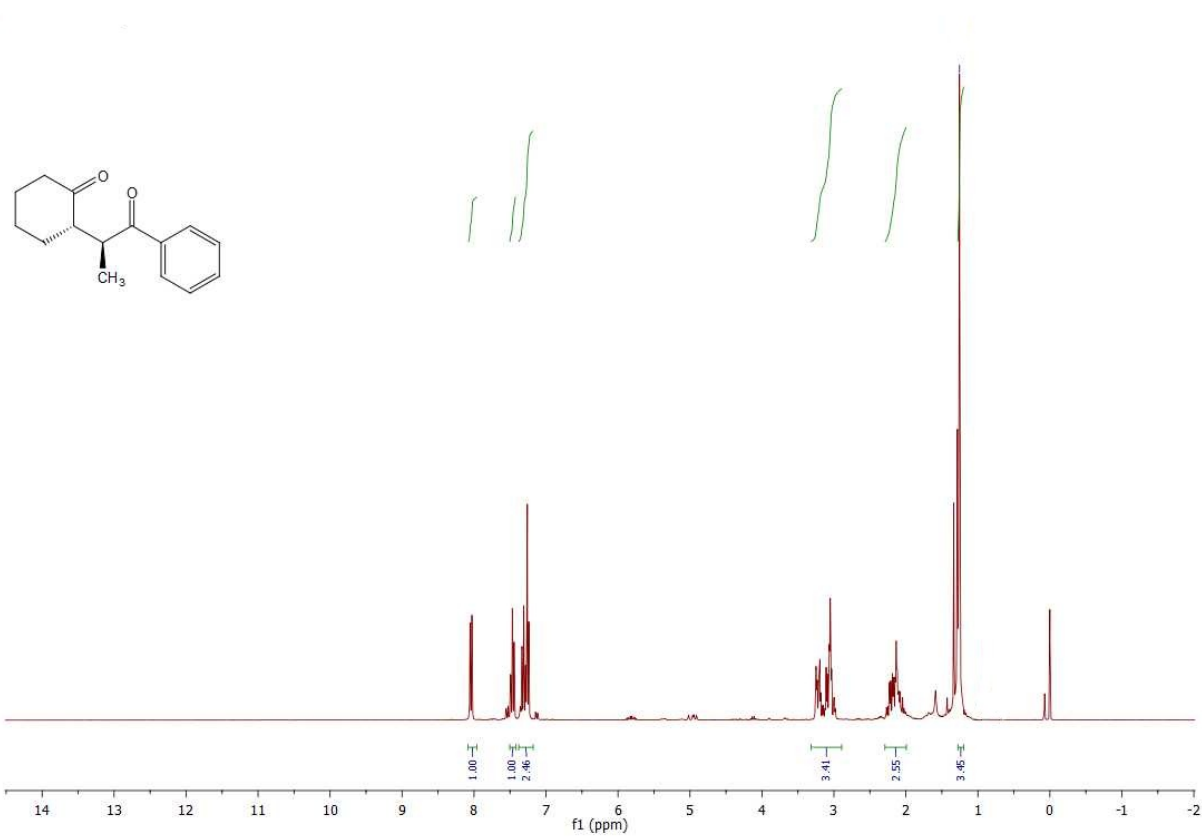

# $^{13}\text{C}$ spectrum of (*S,S*)-10b

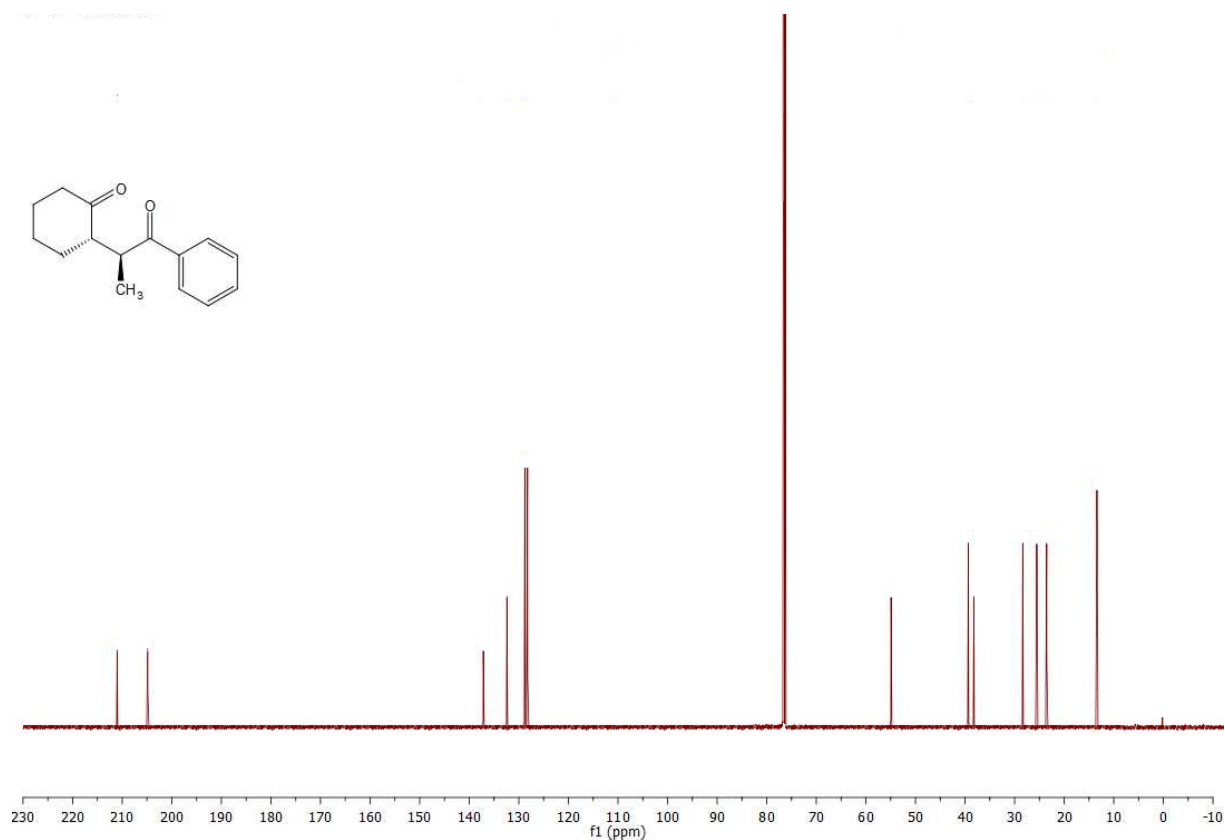



### $^1\text{H}$ NMR spectrum of (*S,R*)-**10b**

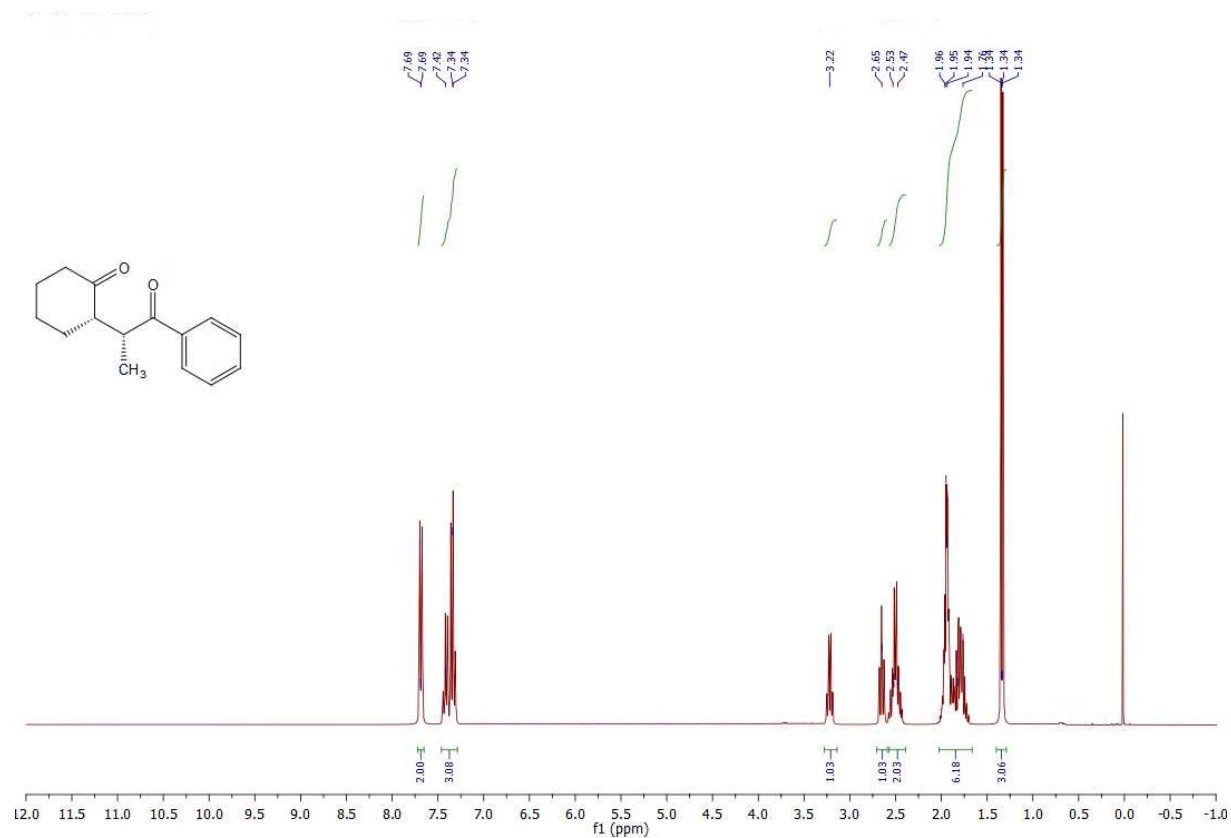

### $^{13}\text{C}$ spectrum of (*S,R*)-**10b**

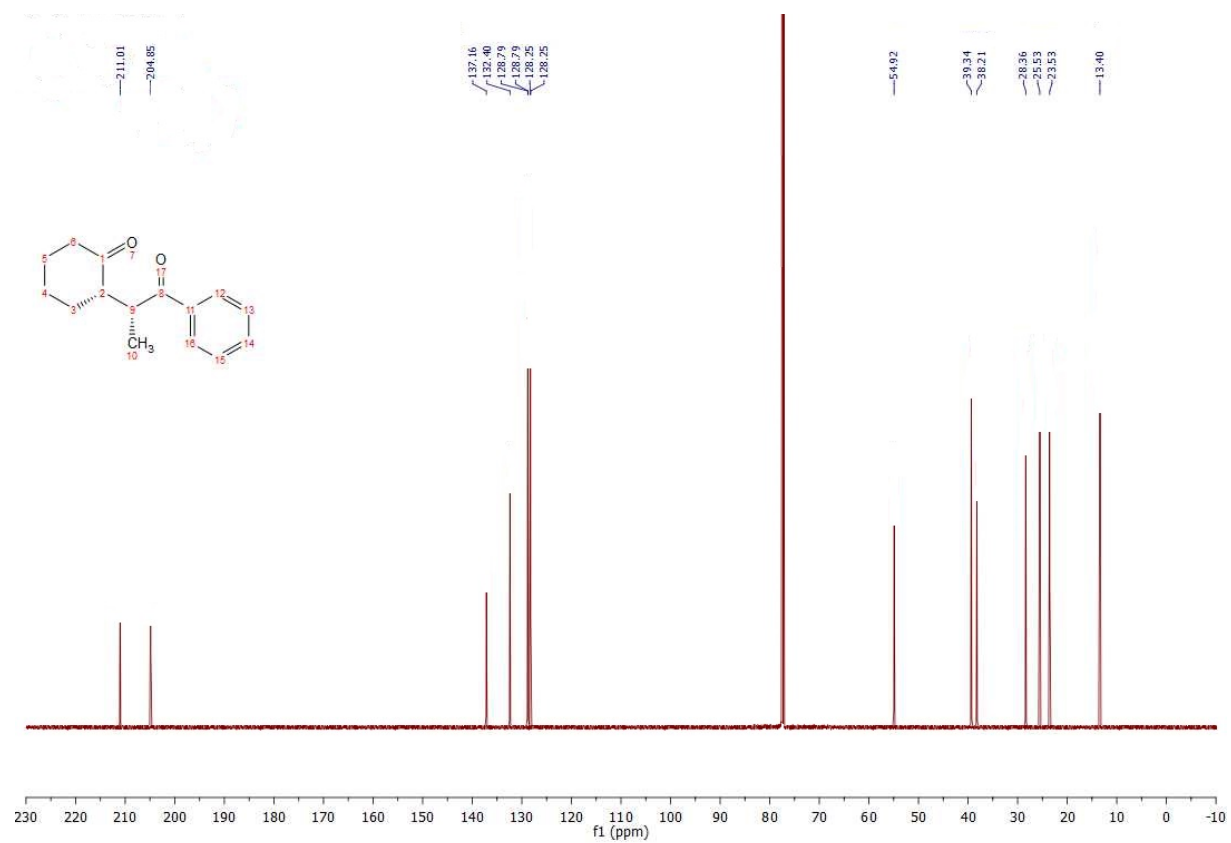



# HPLC chromatograms

3a

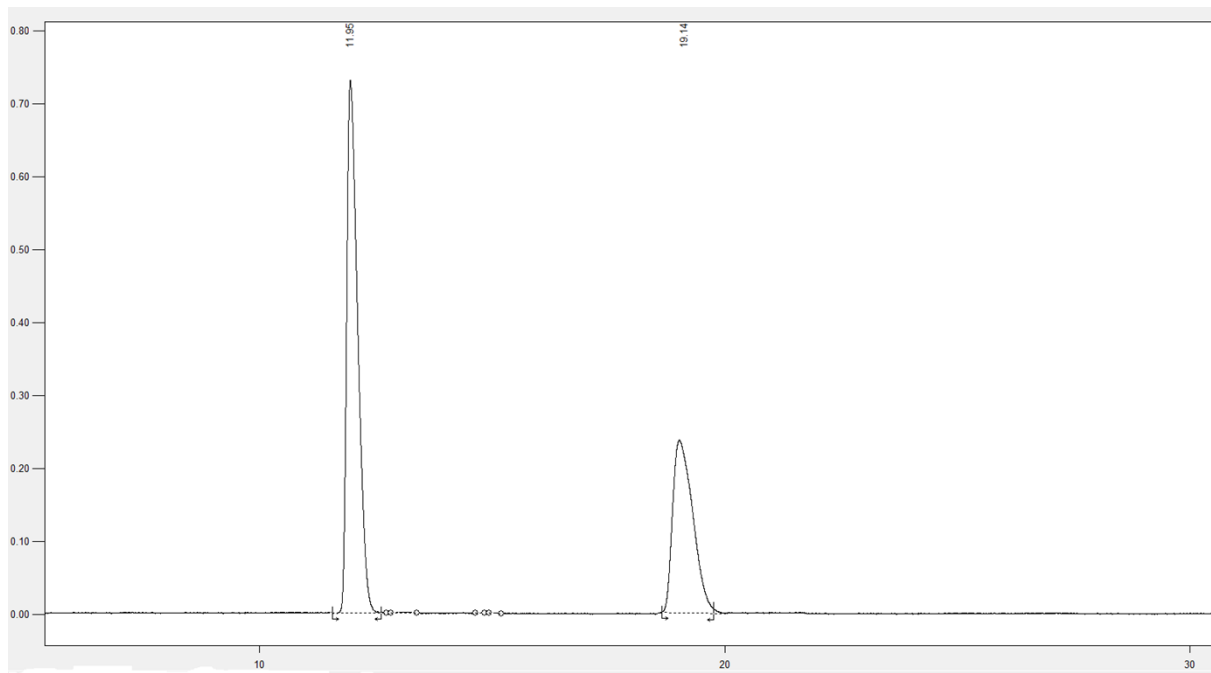

3b

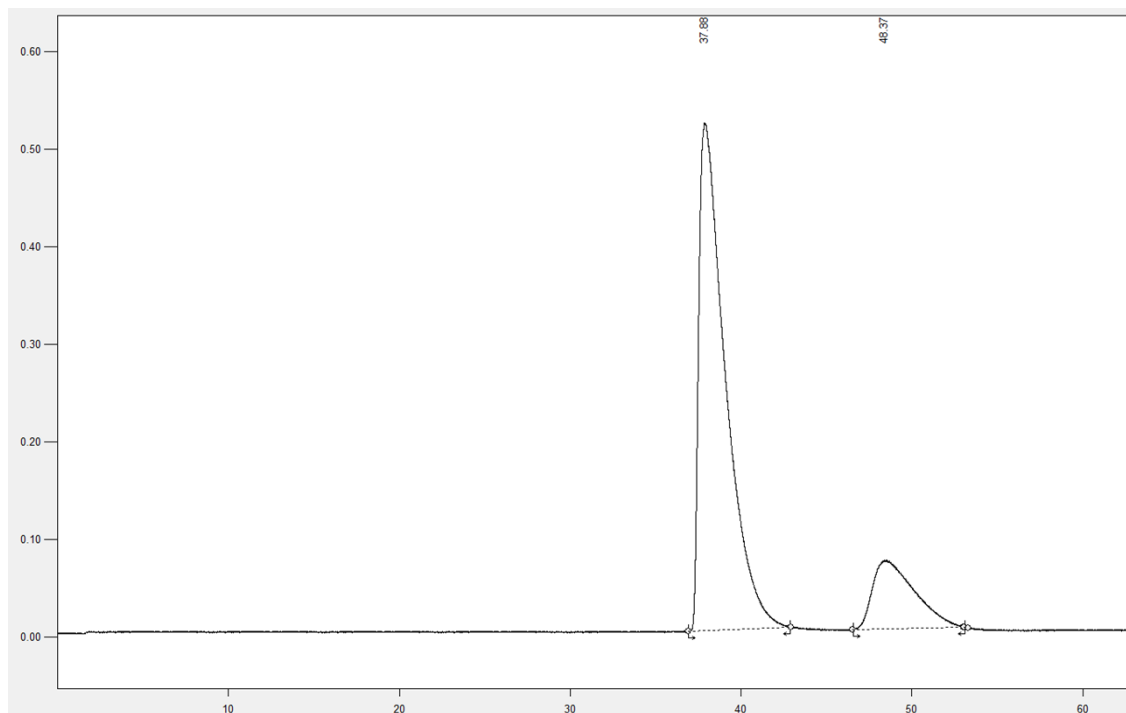

3d

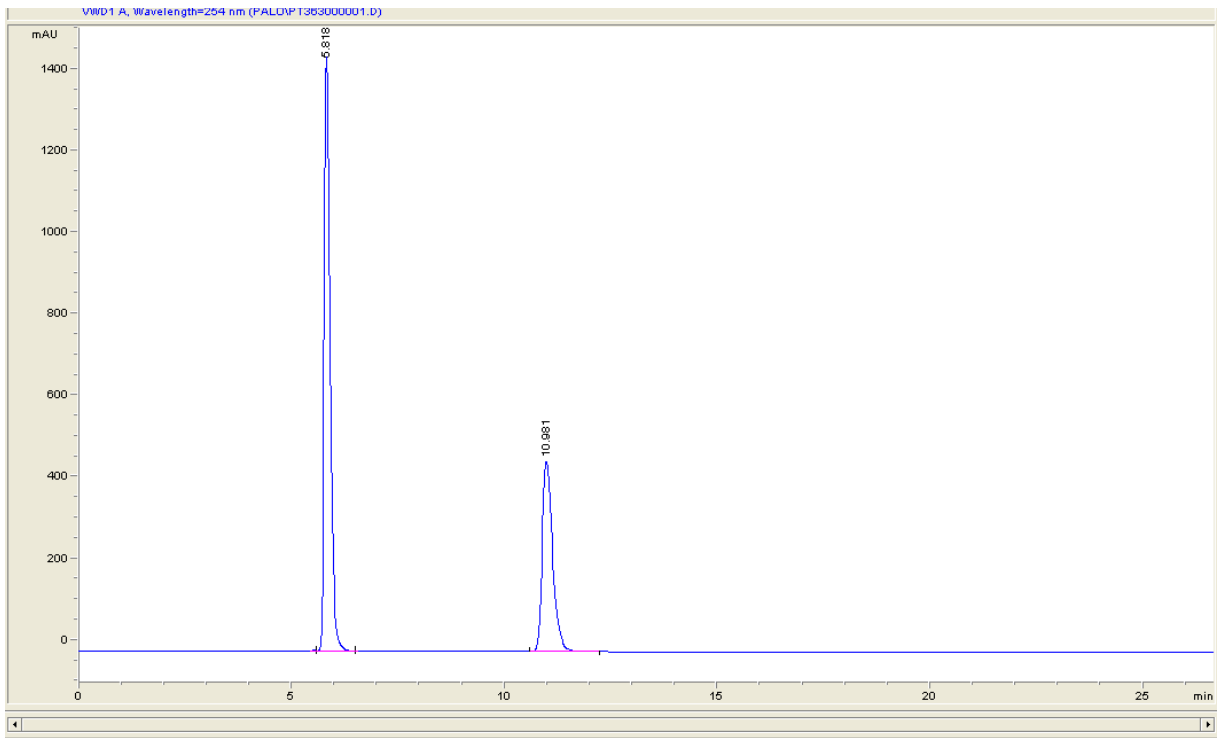

7a

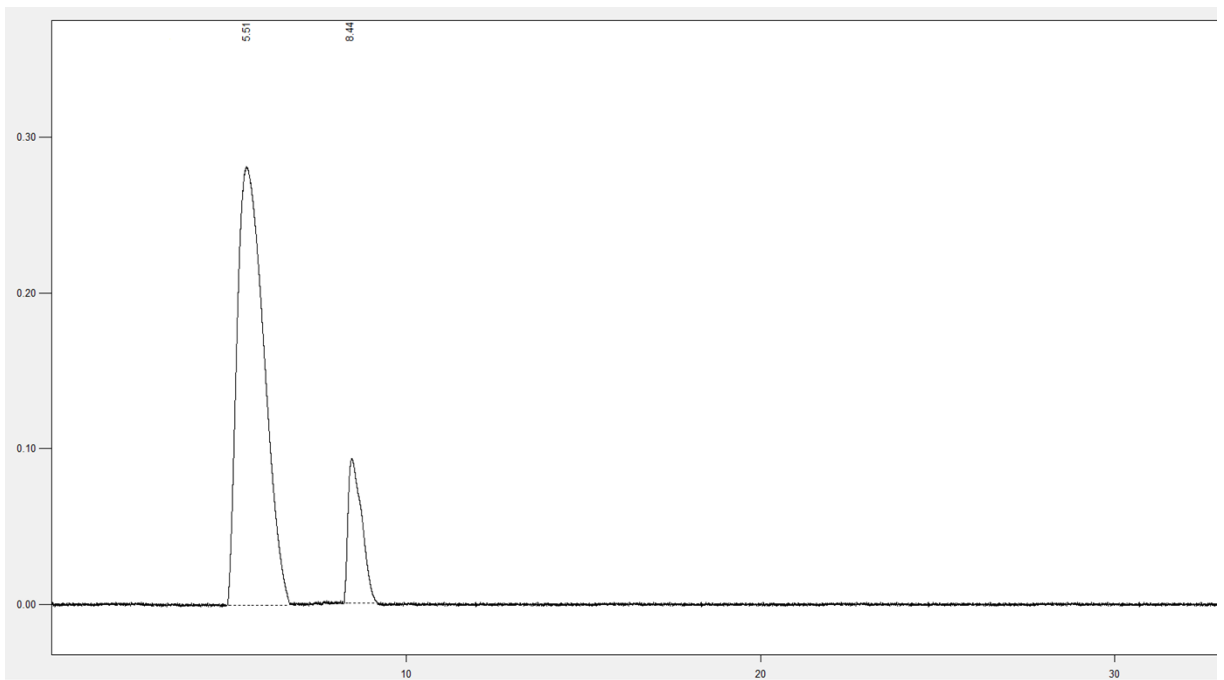

## Calculation of ECD spectra of 7a

The structures (*S*) and (*R*)-7a were drawn and optimized by AM1 method in Spartan program.<sup>1</sup> From the conformer distribution, ten most stable conformers were selected. From among these structures, four most stable conformers were pre-optimized in Spartan at HF/3-21G level.<sup>2</sup> The structures were then refined at RI-DFT<sup>3</sup> level using B3LYP/TZVP in Turbomole package.<sup>4</sup> ECD spectra of conformers 1-4 for each enantiomer were calculated by TD-DFT using M06/TZVP or B3LYP/TZVP (with Random phase approximation).<sup>5</sup>

---

<sup>1</sup> Spartan '08, Wavefunction, Inc., Irvine, CA

<sup>2</sup> Y. Shao, L. F. Molnar, Y. Jung, J. Kussmann, C. Ochsenfeld, S. T. Brown, A. T. B. Gilbert, L. V. Slipchenko, S. V. Levchenko, D. P. O'Neill, R. A. D. Jr, R. C. Lochan, T. Wang, G. J. O. Beran, N. A. Besley, J. M. Herbert, C. Y. Lin, T. V. Voorhis, S. H. Chien, A. Sodt, R. P. Steele, V. A. Rassolov, P. E. Maslen, P. P. Korambath, R. D. Adamson, B. Austin, J. Baker, E. F. C. Byrd, H. Dachsel, R. J. Doerksen, A. Dreuw, B. D. Dunietz, A. D. Dutoi, T. R. Furlani, S. R. Gwaltney, A. Heyden, S. Hirata, C.-P. Hsu, G. Kedziora, R. Z. Khalliulin, P. Klunzinger, A. M. Lee, M. S. Lee, W. Liang, I. Lotan, N. Nair, B. Peters, E. I. Proynov, P. A. Pieniazek, Y. M. Rhee, J. Ritchie, E. Rosta, C. D. Sherrill, A. C. Simmonett, J. E. Subotnik, H. L. Woodcock III, W. Zhang, A. T. Bell and A. K. Chakraborty, *Phys. Chem. Chem. Phys.*, 2006, **8**, 3172 - 3191.

<sup>3</sup> K. Eichkorn, O. Treutler, H. Öhm, M. Häser and R. Ahlrichs, *Chem. Phys. Lett.*, 1995, **242**, 652-660; Eichkorn, K.; Weigend, F.; Treutler, O.; Ahlrichs, R. *Theor. Chem. Acc.* 1997, **97**, 119-124.

<sup>4</sup> TURBOMOLE V6.6, TURBOMOLE GmbH, Karlsruhe, 2014.

<sup>5</sup> Furche, F.; Rappoport D. Ch. III of "Computational Photochemistry", Ed. by M. Olivucci, Vol. 16 of "Computational and Theoretical Chemistry", Elsevier, Amsterdam, 2005; Bauernschmitt, R.; Ahlrichs R. *Chem. Phys. Letters* 1996, 256, 454-464; Bauernschmitt, R.; Häser, M.; Treutler, O.; Ahlrichs; R. *Chem. Phys. Letters* 1997, 264, 573-701; Grimme, S.; Furche, F.; Ahlrichs, R. *Chem. Phys. Letters* 2002, 361, 321-328. Kuehn, M.; Weigend, F. *J. Chem. Theory Comput.* 2013, 9, 5341-5348; van Setten, M.J.; Weigend, F.; Evers, F. *J. Chem. Theory Comput.* 2013, 9, 232-246; Bates, J. E.; Furche, F. *J. Chem. Phys.* 2012, 137, 164105. Kuehn, M.; Weigend, F. *Chem. Phys. Chem.* 2011, 12, 3331-3336.
